# Supplementary material
Source: MDPI journal article supplement (https://www.mdpi.com/2079-9284/11/1/17)

# Natural Deep Eutectic Solvents as a Novel Bio-Based Matrix for Ready-to-Use Natural Antioxidants-Enriched Ingredients: Extraction and Formulation Optimization

Leslie Boudesocque-Delaye <sup>1,\*</sup>, Iron Mike Ardeza <sup>1,2</sup>, Alexis Verger <sup>2</sup>, Roxane Grard <sup>2</sup>, Isabelle Théry-Koné <sup>1</sup>, Xavier Perse <sup>2</sup> and Emilie Munnier <sup>2,\*</sup>

<sup>1</sup> EA 7502 SIMBA, Faculté de Pharmacie, Université de Tours, 31 Avenue Monge, 37200 Tours, France; isabelle.thery@univ-tours.fr (I.T.-K.)

<sup>2</sup> UPR CNRS 4301 CBM, Département NMNS, Faculté de Pharmacie, Université de Tours, 31 Avenue Monge, 37200 Tours, France; alexis.verger@univ-tours.fr (A.V.); perse@univ-tours.fr (X.P.)

\* Correspondence: leslie.boudesocque@univ-tours.fr (L.B.-D.); emilie.munnier@univ-tours.fr (E.M.)

**Table S1: TFC and TCC results of NaDES screening**

| Solvent             | TFC (mg equiv rutin/g biomass) | ANOVA Tuckey   | TCC (µg/g biomass) | ANOVA Tuckey      |
|---------------------|--------------------------------|----------------|--------------------|-------------------|
| <b>EtOH 96%</b>     | 54.90 ± 2.33                   |                | 79.14 ± 5.05       | <i>l, m, n, o</i> |
| <b>Hex: Acetone</b> | 2.31 ± 0.20                    | <i>a</i>       | 169.98 ± 7.23      |                   |
| <b>Castor oil</b>   | 2.27 ± 0.14                    | <i>a</i>       | 20.45 ± 1.64       |                   |
| <b>C8: C10</b>      | 9.82 ± 0.32                    | <i>b, c</i>    | 89.81 ± 5.66       | <i>l, n, o, p</i> |
| <b>C9:C12</b>       | 11.83 ± 0.26                   | <i>b, c, d</i> | 94.11 ± 5.83       | <i>p, q</i>       |
| <b>C9:C10:C12</b>   | 8.09 ± 0.22                    | <i>b</i>       | 72.06 ± 4.52       | <i>m, r, s</i>    |
| <b>C8:Lac</b>       | 24.26 ± 2.04                   | <i>e, f</i>    | 126.43 ± 5.74      | <i>t</i>          |
| <b>Pro:Gly</b>      | 12.91 ± 2.43                   | <i>c, g</i>    | 51.05 ± 3.00       | <i>u</i>          |
| <b>Pro:Lev</b>      | 16.43 ± 2.11                   | <i>g, h, i</i> | 86.58 ± 4.04       | <i>n, v, w</i>    |
| <b>Bet:Gly</b>      | 76.58 ± 6.84                   |                | 129.11 ± 19.55     | <i>t</i>          |
| <b>Bet:Lev</b>      | 23.52 ± 0.72                   | <i>e, j</i>    | 110.85 ± 5.94      |                   |
| <b>Lev:Gly</b>      | 25.72 ± 3.38                   | <i>f, j</i>    | 81.05 ± 3.80       | <i>o, q, r, v</i> |
| <b>Prop:Lev</b>     | 16.30 ± 0.79                   | <i>h, i, k</i> | 66.41 ± 3.43       | <i>w</i>          |
| <b>Prop:Gly</b>     | 14.01 ± 1.35                   | <i>d, k</i>    | 56.75 ± 4.24       | <i>s, u</i>       |

*a to w : sample that share letter are non-significantly different  $p > 0.05$*

**Table S2: Statistics for UAE DoE**

| TCC (µg/g biomass) |                |    |             |         |         |
|--------------------|----------------|----|-------------|---------|---------|
| Source             | Sum of Squares | df | Mean Square | F-value | p-value |

|                  |          |    |          |        |          |                 |
|------------------|----------|----|----------|--------|----------|-----------------|
| <b>Model</b>     | 57148.74 | 6  | 9524.79  | 34.11  | < 0.0001 | significant     |
| A-S/L ratio      | 17785.19 | 1  | 17785.19 | 63.69  | < 0.0001 |                 |
| B-Temp.          | 913.73   | 1  | 913.73   | 3.27   | 0.1081   |                 |
| C-Time           | 1548.46  | 1  | 1548.46  | 5.54   | 0.0463   |                 |
| AB               | 3837.66  | 1  | 3837.66  | 13.74  | 0.0060   |                 |
| AC               | 3.42     | 1  | 3.42     | 0.0123 | 0.9146   |                 |
| A <sup>2</sup>   | 33060.27 | 1  | 33060.27 | 118.39 | < 0.0001 |                 |
| <b>Residual</b>  | 2234.05  | 8  | 279.26   |        |          |                 |
| Lack of Fit      | 1844.69  | 6  | 307.45   | 1.58   | 0.4370   | not significant |
| Pure Error       | 389.36   | 2  | 194.68   |        |          |                 |
| <b>Cor Total</b> | 59382.79 | 14 |          |        |          |                 |

|                  |        |                                |         |
|------------------|--------|--------------------------------|---------|
| <b>Std. Dev.</b> | 16.71  | <b>R<sup>2</sup></b>           | 0.9624  |
| <b>Mean</b>      | 214.34 | <b>Adjusted R<sup>2</sup></b>  | 0.9342  |
| <b>C.V. %</b>    | 7.80   | <b>Predicted R<sup>2</sup></b> | 0.8581  |
|                  |        | <b>Adeq Precision</b>          | 16.3056 |

#### TFC (mg Equiv Rutin/mg biomass)

| Source           | Sum of Squares | df                             | Mean Square | F-value | p-value                |
|------------------|----------------|--------------------------------|-------------|---------|------------------------|
| <b>Model</b>     | 452.15         | 6                              | 75.36       | 18.83   | < 0.0001 significant   |
| A-S/L ratio      | 34.90          | 1                              | 34.90       | 8.72    | 0.0145                 |
| B-Temp           | 1.33           | 1                              | 1.33        | 0.3311  | 0.5777                 |
| C-Time           | 0.6235         | 1                              | 0.6235      | 0.1558  | 0.7014                 |
| AB               | 27.40          | 1                              | 27.40       | 6.85    | 0.0257                 |
| AC               | 15.54          | 1                              | 15.54       | 3.88    | 0.0771                 |
| A <sup>2</sup>   | 372.35         | 1                              | 372.35      | 93.04   | < 0.0001               |
| <b>Residual</b>  | 40.02          | 10                             | 4.00        |         |                        |
| Lack of Fit      | 18.72          | 6                              | 3.12        | 0.5861  | 0.7341 not significant |
| Pure Error       | 21.30          | 4                              | 5.32        |         |                        |
| <b>Cor Total</b> | 492.17         | 16                             |             |         |                        |
| <b>Std. Dev.</b> | 2.00           | <b>R<sup>2</sup></b>           | 0.9187      |         |                        |
| <b>Mean</b>      | 18.63          | <b>Adjusted R<sup>2</sup></b>  | 0.8699      |         |                        |
| <b>C.V. %</b>    | 10.74          | <b>Predicted R<sup>2</sup></b> | 0.7550      |         |                        |
|                  |                | <b>Adeq Precision</b>          | 11.1877     |         |                        |

**Table S3: Statistics for DAC DoE**

| TCC (µg/g biomass) |                |                |             |         |                        |  |
|--------------------|----------------|----------------|-------------|---------|------------------------|--|
| Source             | Sum of Squares | df             | Mean Square | F-value | p-value                |  |
| Model              | 77079.81       | 6              | 12846.64    | 28.67   | < 0.0001 significant   |  |
| A-S/L ratio        | 8877.04        | 1              | 8877.04     | 19.81   | 0.0021                 |  |
| B-time             | 809.46         | 1              | 809.46      | 1.81    | 0.2158                 |  |
| C-Speed            | 105.23         | 1              | 105.23      | 0.2348  | 0.6409                 |  |
| AC                 | 1799.27        | 1              | 1799.27     | 4.02    | 0.0800                 |  |
| BC                 | 2045.57        | 1              | 2045.57     | 4.57    | 0.0651                 |  |
| A²                 | 53561.69       | 1              | 53561.69    | 119.54  | < 0.0001               |  |
| Residual           | 3584.67        | 8              | 448.08      |         |                        |  |
| Lack of Fit        | 2625.43        | 5              | 525.09      | 1.64    | 0.3624 not significant |  |
| Pure Error         | 959.24         | 3              | 319.75      |         |                        |  |
| Cor Total          | 80664.48       | 14             |             |         |                        |  |
| Std. Dev.          | 21.17          | R²             |             | 0.9556  |                        |  |
| Mean               | 254.50         | Adjusted R²    |             | 0.9222  |                        |  |
| C.V. %             | 8.32           | Predicted R²   |             | 0.7704  |                        |  |
|                    |                | Adeq Precision |             | 15.8151 |                        |  |

| TFC (mg equiv rutin/g biomass) |                |                |             |         |         |                        |
|--------------------------------|----------------|----------------|-------------|---------|---------|------------------------|
| Source                         | Sum of Squares | df             | Mean Square | F-value | p-value |                        |
| Model                          |                | 783.51         | 5           | 156.70  | 42.75   | < 0.0001 significant   |
| A-S/L ratio                    |                | 401.70         | 1           | 401.70  | 109.60  | < 0.0001               |
| B-time                         |                | 30.69          | 1           | 30.69   | 8.37    | 0.0178                 |
| AB                             |                | 20.88          | 1           | 20.88   | 5.70    | 0.0408                 |
| A²                             |                | 460.06         | 1           | 460.06  | 125.52  | < 0.0001               |
| B²                             |                | 104.99         | 1           | 104.99  | 28.64   | 0.0005                 |
| Residual                       |                | 32.99          | 9           | 3.67    |         |                        |
| Lack of Fit                    |                | 24.89          | 6           | 4.15    | 1.54    | 0.3888 not significant |
| Pure Error                     |                | 8.09           | 3           | 2.70    |         |                        |
| Cor Total                      |                | 816.50         | 14          |         |         |                        |
| Std. Dev.                      | 1.91           | R²             |             | 0.9596  |         |                        |
| Mean                           | 32.31          | Adjusted R²    |             | 0.9372  |         |                        |
| C.V. %                         | 5.93           | Predicted R²   |             | 0.8494  |         |                        |
|                                |                | Adeq Precision |             | 16.8166 |         |                        |

**Figure S1**

Pictures of the BGCE-enriched creams prepared

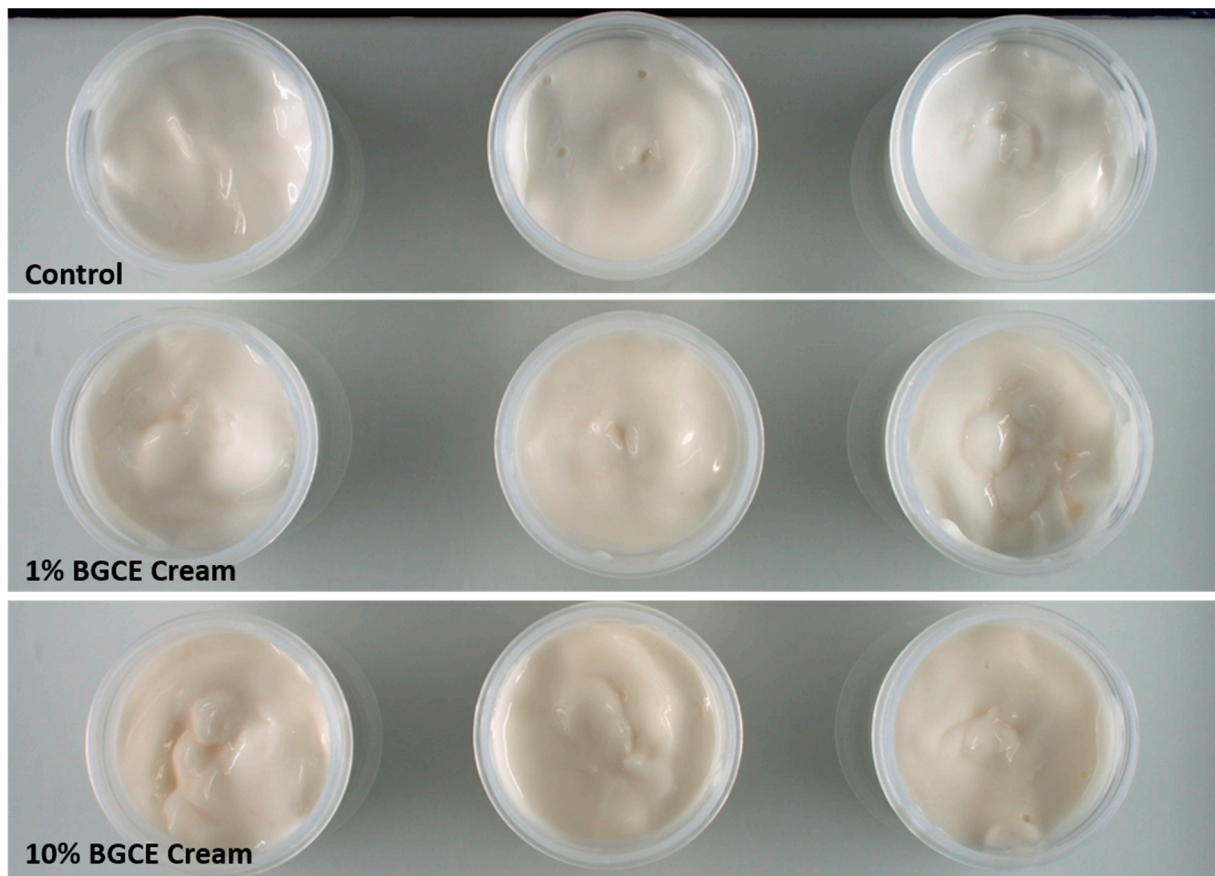

Supplement: s1 [file s1]
